# Supplementary material for: Candidate genes associated with red colour formation revealed by comparative genomic variant analysis of red- and green-skinned fruits of Japanese apricot (Prunus mume)
Source: PeerJ. 2018 May 4;6:e4625. doi: 10.7717/peerj.4625 (PMC5937475; doi:10.7717/peerj.4625)
Supplement: Supplemental Information 1 [file peerj-06-4625-s001.xlsx]

## Sheet: Table 7
Supplementary table S1: The distribution of SNPs in all eight chromesomes among all six cultivars.: The distribution of SNPs in all eight chromesomes among all six cultivars.: The distribution of SNPs in all eight chromesomes among all six cultivars.
	SNP								Homo								Hete
	Green-mei				Red-mei				Green-mei				Red-mei				Green-mei				Red-mei
	‘QJM’	‘SKM’	‘YLM’		‘RHM’	‘XZM’	‘ZHM’		‘QJM’	‘SKM’	‘YLM’		‘RHM’	‘XZM’	‘ZHM’		‘QJM’	‘SKM’	‘YLM’		‘RHM’	‘XZM’	‘ZHM’
Chr1	166007	143524	159529		150424	107404	147623		92874	94453	91424		83444	59517	97931		73133	49071	68105		66980	47887	49692
Chr2	261388	232034	246977		229989	163701	241581		135191	140831	142810		125313	94613	138335		126197	91203	104167		104676	69088	103246
Chr3	155245	139396	145152		129369	100086	142790		79638	82632	84163		84711	55806	83754		75607	56764	60989		44658	44280	59036
Chr4	151574	141563	147937		137002	96491	142169		79880	76380	79206		69551	57936	77535		71694	65183	68731		67451	38555	64634
Chr5	152782	128753	147792		143854	99272	149504		80467	84010	78606		64476	51866	74293		72315	44743	69186		79378	47406	75211
Chr6	133762	117686	122529		117724	84626	118677		68504	68879	73164		63059	46808	70433		65258	48807	49365		54665	37818	48244
Chr7	106297	97892	104908		94668	70324	105372		58564	59849	59008		54923	38644	55661		47733	38043	45900		39745	31680	49711
Chr8	107576	98515	104279		91473	67743	103441		63979	60513	59714		63973	42669	59513		43597	38002	44565		27500	25074	43928
Pseudo	152887	140997	152238		137122	104655	150754		77492	83385	83099		67749	55059	80016		75395	57612	69139		69373	49596	70738
Total	1387518	1240360	1331341		1231625	894302	1301911		736589	750932	751194		677199	502918	737471		650929	489428	580147		554426	391384	564440
a chromesome
