# Supplementary material for: Candidate genes associated with red colour formation revealed by comparative genomic variant analysis of red- and green-skinned fruits of Japanese apricot (Prunus mume)
Source: PeerJ. 2018 May 4;6:e4625. doi: 10.7717/peerj.4625 (PMC5937475; doi:10.7717/peerj.4625)
Supplement: Supplemental Information 2 [file peerj-06-4625-s002.xlsx]

## Sheet: InDel_chr
Supplementary table S2: The distribution of InDels in all eight chromesomes among all six cultivars.
		InDel								Insertion Percentage								Deletion Percentage
		Green-mei				Red-mei				Green-mei				Red-mei				Green-mei				Red-mei
		‘QJM’	‘SKM’	‘YLM’		‘RHM’	‘XZM’	‘ZHM’		‘QJM’	‘SKM’	‘YLM’		‘RHM’	‘XZM’	‘ZHM’		‘QJM’	‘SKM’	‘YLM’		‘RHM’	‘XZM’	‘ZHM’
Chr1		9688	10468	9736		9150	8555	10205		0.478737	0.492549	0.49507		0.481421	0.492577	0.49368		0.521263	0.507451	0.50493		0.518579	0.507423	0.50632
Chr2		14942	15908	14988		14070	13308	15478		0.477178	0.485793	0.482586		0.471429	0.486174	0.484882		0.522822	0.514207	0.517414		0.528571	0.513826	0.515118
Chr3		8194	8847	8362		7867	7289	8466		0.472907	0.494066	0.487802		0.483157	0.489916	0.489487		0.527093	0.505934	0.512198		0.516843	0.510084	0.510513
Chr4		8495	8787	8475		7835	7445	8481		0.474868	0.494594	0.490383		0.48462	0.494694	0.491687		0.525132	0.505406	0.509617		0.51538	0.505306	0.508313
Chr5		8966	9388	8513		7798	7567	8761		0.475017	0.489029	0.488077		0.471018	0.490815	0.491154		0.524983	0.510971	0.511923		0.528982	0.509185	0.508846
Chr6		7449	7850	7551		6955	6534	7848		0.47107	0.487261	0.490663		0.482531	0.490664	0.485219		0.52893	0.512739	0.509337		0.517469	0.509336	0.514781
Chr7		6258	6551	6123		5886	5438	6108		0.479706	0.489849	0.485873		0.478253	0.483634	0.492469		0.520294	0.510151	0.514127		0.521747	0.516366	0.507531
Chr8		6703	6741	6437		6522	5844	6525		0.487543	0.48613	0.493553		0.482367	0.492813	0.491801		0.512457	0.51387	0.506447		0.517633	0.507187	0.508199
pseudo		6695	7532	7196		6081	6075	7288		0.479706	0.489849	0.485873		0.478253	0.483634	0.492469		0.520294	0.510151	0.514127		0.521747	0.516366	0.507531
Total		77390	82072	77381		72164	68055	79160		36947.1	40207.2	37829.7		34583	33308.6	38813.4		40442.9	41864.8	39551.3		37581	34746.4	40346.6
