# Supplementary material for: Candidate genes associated with red colour formation revealed by comparative genomic variant analysis of red- and green-skinned fruits of Japanese apricot (Prunus mume)
Source: PeerJ. 2018 May 4;6:e4625. doi: 10.7717/peerj.4625 (PMC5937475; doi:10.7717/peerj.4625)
Supplement: Supplemental Information 3 [file peerj-06-4625-s003.xlsx]

## Sheet: SVs_chr
Supplemental table S3: The distribution of SVs in all eight chromesomes among all six cultivars.
		SVs								Insertion								Deletion								Others
		Green-mei				Red-mei				Green-mei				Red-mei				Green-mei				Red-mei				Green-mei				Red-mei
		‘QJM’	‘SKM’	‘YLM’		‘RHM’	‘XZM’	‘ZHM’		‘QJM’	‘SKM’	‘YLM’		‘RHM’	‘XZM’	‘ZHM’		‘QJM’	‘SKM’	‘YLM’		‘RHM’	‘XZM’	‘ZHM’		‘QJM’	‘SKM’	‘YLM’		‘RHM’	‘XZM’	‘ZHM’
Chr1		4604	2408	1502		2227	1290	2443		0.605343	0.43314	0.0685752		0.295914	0.243411	0.457225		0.357081	0.515781	0.841545		0.638527	0.692248	0.497339		0.037576	0.0510797	0.0898802		0.065559	0.0643411	0.0454359
Chr2		7369	3880	2333		3427	1899	3841		0.616637	0.423969	0.0694385		0.307266	0.234334	0.450664		0.34048	0.523969	0.846978		0.631164	0.707214	0.502734		0.0428823	0.0520619	0.0835834		0.0615699	0.0584518	0.0466024
Chr3		4245	2339	1398		1994	1262	2479		0.605183	0.436084	0.0751073		0.328987	0.277338	0.476402		0.338987	0.496366	0.809728		0.58325	0.640254	0.457443		0.0558304	0.0675502	0.115165		0.0877633	0.0824089	0.0661557
Chr4		4170	2205	1384		1986	1056	2217		0.608873	0.428118	0.0794798		0.311682	0.253788	0.455571		0.345324	0.5161	0.816474		0.622356	0.662879	0.482183		0.0458034	0.0557823	0.104046		0.0659617	0.0833333	0.0622463
Chr5		4389	2371	1454		2131	1214	2509		0.593074	0.427668	0.0612105		0.282496	0.246293	0.456357		0.349054	0.501898	0.821871		0.628344	0.664745	0.478278		0.057872	0.0704344	0.116919		0.08916	0.0889621	0.0653647
Chr6		4173	2221	1235		2223	1165	2402		0.619698	0.47276	0.0631579		0.402159	0.321888	0.532473		0.326863	0.462404	0.842105		0.532614	0.596567	0.409242		0.0534388	0.0648357	0.0947368		0.0652272	0.0815451	0.0582848
Chr7		3024	1635	1005		1474	852	1664		0.598214	0.40367	0.0616915		0.302578	0.213615	0.421875		0.357143	0.533333	0.835821		0.626187	0.704225	0.519832		0.0446429	0.0629969	0.102488		0.0712347	0.0821596	0.0582933
Chr8		2967	1490	930		1337	708	1484		0.631951	0.428188	0.0688172		0.31638	0.227401	0.442049		0.328952	0.52953	0.854839		0.624533	0.710452	0.510108		0.0390967	0.0422819	0.0763441		0.0590875	0.0621469	0.0478437
Pseudo		5114	3401	1696		3052	1960	3823		0.59914	0.534255	0.0878538		0.442333	0.453571	0.61627		0.329488	0.403411	0.797759		0.476081	0.480612	0.334031		0.0713727	0.0623346	0.114387		0.0815858	0.0658163	0.0496992
Total		40055	21950	12937		19851	11406	22862		0.608563	0.447882	0.0712685		0.337615	0.287831	0.48889		0.341256	0.493121	0.829018		0.590298	0.639225	0.456259		0.050181	0.0589977	0.099714		0.072087	0.0729441	0.0548508
